# Supplementary material
Source: PubMed Central journal article supplement (PMC10514869)
Supplement: jama-e2318768-s001.pdf [file jama-e2318768-s001.pdf]

## Data Sharing Statement

### Data

**Data available:** Yes

**Data types:** Data (not involving human participants)

**How to access data:** The NYC asthma daiy ED visits data by age group and boroughs are publicly available from the NYC Department of Health and Mental Hygiene Syndromic Surveillance Data: <https://a816-health.nyc.gov/hdi/epiquery/visualizations?PageType=ts&PopulationSource=Syndromic&Topic=1&Subtopic=39>

**When available:** With publication

### Supporting Documents

**Document types:** None

### Additional Information

**Who can access the data:** Anyone requesting the data can directly access the data from the NYC Department of Health and Mental Hygiene website.

**Types of analyses:** Please refer to the NYC Department of Health and Mental Hygiene website.

**Mechanisms of data availability:** Please refer to the NYC Department of Health and Mental Hygiene website.
